# Supplementary material for: Bicyclic (amino)(borata)carbene derived from diazadiborinine and isonitrile
Source: Royal Society of Chemistry journal article supplement (doi:10.1039/c9cc06453b), 2019-01-01
Supplement: c9cc06453b1.pdf [file c9cc06453b1.pdf]

## **Bicyclic (amino)(borata)carbene derived from diazadiborinine**

Baolin Wang, Kota Koshino, and Rei Kinjo\*

### **Table of Contents**

**1. Synthesis of compounds 2, 3, 4, 5 and their spectral data**

**2. Crystal structural parameters**

**3. Theoretical calculations**

**4. References**

---

## 1. Synthesis of compounds 2, 3, 4, 5 and their spectral data

General considerations: All reactions were performed under an atmosphere of argon or nitrogen by using standard schlenk or dry box techniques; solvents were dried over Na metal, K metal or CaH<sub>2</sub>. Reagents were of analytical grade, obtained from commercial suppliers and used without further purification. <sup>1</sup>H, <sup>11</sup>B, <sup>13</sup>C NMR spectra were obtained with a Bruker AVIII 400MHz BBFO spectrometer at 298 K unless otherwise stated. NMR multiplicities are abbreviated as follows: s = singlet, d = doublet, t = triplet, m = multiplet, br = broad signal. Coupling constants J are given in Hz. Electrospray ionization (ESI) mass spectra were obtained at the Mass Spectrometry Laboratory at the Division of Chemistry and Biological Chemistry, Nanyang Technological University. Melting points were measured with an OpticMelt Stanford Research System.

### Synthesis of 2

A deuterated benzene (0.6 mL) solution of 1,4,2,5-diazadiborinine **1**<sup>[S1]</sup> (20 mg, 0.06 mmol) was added phenyl isocyanide (12.2 mg, 0.12 mmol) in a Young NMR tube. The reaction was monitored by NMR. After 10 minutes at room temperature, all volatiles were removed under vacuum, and recrystallization from a benzene solution afforded colorless single crystals of **2**, which were collected and dried under vacuum (15 mg, 47%).

M. p.(219 °C). <sup>1</sup>H NMR (400 MHz, CDCl<sub>3</sub>): δ = 8.16 (dd, *J* = 7.9, 1.4 Hz, 2H, Ar-*H*), 8.01 (dd, *J* = 6.5, 3.0 Hz, 2H, Ar-*H*), 7.59 – 7.49 (m, 3H, Ar-*H*), 7.33 (m, 4H, Ar-*H*), 7.24 – 7.21 (m, 1H, Ar-*H*), 7.10 (dd, *J* = 8.4, 7.3 Hz, 2H), 6.99 (d, *J* = 1.6 Hz, 1H, CH), 6.85 – 6.79 (m, 2H, Ar-*H*), 6.68 – 6.59 (m, 3H, Ar-*H*), 6.56 (d, *J* = 1.6 Hz, 1H, CH), 6.41 (d, *J* = 1.6 Hz, 1H, CH), 6.36 (d, *J* = 1.6 Hz, 1H, CH), 5.47 (s, 1H, NH), 3.47 (s, 3H, N-CH<sub>3</sub>), 3.01 (s, 3H, N-CH<sub>3</sub>); <sup>13</sup>C{<sup>1</sup>H} NMR (101 MHz, CDCl<sub>3</sub>): δ = 148.7 (Ar-C), 141.2 (Ar-C), 136.1 (Ar-CH), 135.8 (Ar-CH), 129.2 (Ar-C), 128.8 (Ar-CH), 128.0 (Ar-CH), 127.9 (Ar-CH), 127.8 (Ar-CH), 127.0 (Ar-CH), 121.9 (Ar-CH), 121.6 (Ar-C), 121.4 (Ar-CH), 120.0 (Ar-CH), 119.9 (Ar-CH), 119.3 (CH), 118.6 (CH), 116.9 (CH), 116.6 (CH), 114.1 (Ar-CH), 113.9 (Ar-CH), 36.6 (CH<sub>3</sub>), 35.5 (CH<sub>3</sub>); <sup>11</sup>B{H} NMR (128 MHz, CDCl<sub>3</sub>): δ = – 3.0 (br), – 6.8 (br). HRMS (ESI): *m/z* calcd for C<sub>34</sub>H<sub>31</sub>B<sub>2</sub>N<sub>6</sub>: 545.2796 [(*M+H*)<sup>+</sup>]; found: 545.2787.

---

### Synthesis of 3

Deuterated benzene (0.5 mL) was added to the mixture of 1,4,2,5-diazadiborinine **1** (20 mg, 0.06 mmol) and 2,6-dimethylphenyl isocyanide (15.5 mg, 0.12 mmol) in a Young NMR tube. The reaction was monitored by NMR. After 10 minutes at room temperature, recrystallization from a benzene solution afforded yellow single crystals of **3**, which were collected and dried under vacuum (18 mg, 51%).

M. p.(198 °C). <sup>1</sup>H NMR (400 MHz, C<sub>6</sub>D<sub>6</sub>): δ = 8.18 – 8.12 (m, 2H, Ar-H), 7.37 (t, *J* = 7.3 Hz, 2H, Ar-H), 7.30 – 7.24 (m, 3H, Ar-H), 7.16 (m, 3H, Ar-H), 7.06 (s, 3H, Ar-H), 6.89 (d, *J* = 7.5 Hz, 2H, Ar-H), 6.81 (m, 3H, CH, Ar-H), 5.73 (d, *J* = 1.5 Hz, 1H, CH), 5.67 (d, *J* = 1.6 Hz, 1H, CH), 2.54 (s, 3H, N-CH<sub>3</sub>), 2.44 (s, 3H, N-CH<sub>3</sub>), 2.09 (s, 6H, CH<sub>3</sub>), 1.92 (s, 3H, CH<sub>3</sub>), 1.84 (s, 3H, CH<sub>3</sub>); <sup>13</sup>C{<sup>1</sup>H} NMR (101 MHz, C<sub>6</sub>D<sub>6</sub>): δ = 207.1 (CCN), 148.9 (Ar-C), 144.2 (Ar-C), 139.6 (Ar-C), 138.6 (Ar-C), 135.5 (Ar-CH), 134.2 (Ar-CH), 131.0 (Ar-C), 128.5 (Ar-CH), 128.22 (Ar-CH), 128.20 (Ar-CH), 128.16 (Ar-CH), 128.1 (Ar-CH), 127.3 (Ar-CH), 127.0 (Ar-CH), 125.0 (Ar-CH), 123.8 (Ar-CH), 120.8 (CH), 120.6 (CH), 119.8 (CH), 119.3 (CH), 34.9 (N-CH<sub>3</sub>), 34.6 (N-CH<sub>3</sub>), 19.6 (CH<sub>3</sub>), 19.2 (CH<sub>3</sub>), 18.1 (CH<sub>3</sub>); <sup>11</sup>B{<sup>1</sup>H} NMR (128 MHz, C<sub>6</sub>D<sub>6</sub>): δ = - 4.2 (br), - 6.9 (br); HRMS (ESI): *m/z* calcd for C<sub>38</sub>H<sub>39</sub>B<sub>2</sub>N<sub>6</sub>: 601.3422 [(*M+H*)<sup>+</sup>]; found: 601.3414.

### Synthesis of 4

A THF (1 mL) solution of 1,4,2,5-diazadiborinine **1** (30 mg, 0.089 mmol) was added *p*-methylphenyl(phenyl isocyanide)gold(I)<sup>[52]</sup> (34.7 mg, 0.089 mmol) at room temperature. The orange color of **1** fades within 5 minutes. Recrystallization from a THF solution afforded colorless crystals of **4**, which were collected and dried under vacuum (39 mg, 60%).

M. p.:128 °C (dec.). <sup>1</sup>H NMR (400 MHz, CD<sub>2</sub>Cl<sub>2</sub>): δ = 9.04 (d, *J* = 6.8 Hz, 2H, Ar-H), 7.55 (t, *J* = 7.5 Hz, 2H, Ar-H), 7.47 – 7.37 (m, 2H, Ar-H), 7.34 (t, *J* = 7.4 Hz, 1H, Ar-H), 7.30 – 7.16 (m, 7H, Ar-H), 7.10 (d, *J* = 1.6 Hz, 1H, CH), 7.02 (d, *J* = 7.7 Hz, 2H, Ar-H), 6.96 (d, *J* = 7.4 Hz, 1H, Ar-H), 6.90 (d, *J* = 1.6 Hz, 1H, CH), 6.85 (d, *J* = 7.3 Hz, 2H, Ar-H), 6.65 (d, *J* = 1.6 Hz, 1H, CH), 6.64 (d, *J* = 1.6 Hz, 1H, CH), 3.21 (s, 3H, N-CH<sub>3</sub>), 3.06 (s, 3H, N-CH<sub>3</sub>), 2.21 (s, 3H, CH<sub>3</sub>); <sup>13</sup>C{<sup>1</sup>H} NMR (101 MHz, CD<sub>2</sub>Cl<sub>2</sub>): δ = 170.6 (Ar-C), 154.6 (Ar-C), 141.1 (Ar-CH), 137.5 (Ar-CH), 135.1 (Ar-CH), 133.1 (Ar-C), 129.0 (Ar-CH), 128.4 (Ar-CH), 128.21 (Ar-CH), 128.20 (Ar-CH), 127.62 (Ar-CH), 127.57 (Ar-CH), 127.5 (Ar-CH),

---

126.6 (Ar-CH), 126.4 (Ar-CH), 125.9 (Ar-CH), 122.4 (CH), 122.0 (CH), 121.7 (CH), 121.2 (CH), 36.16 (N-CH<sub>3</sub>), 35.6 (N-CH<sub>3</sub>), 21.3 (N-CH<sub>3</sub>); <sup>11</sup>B{<sup>1</sup>H} NMR (128 MHz, CD<sub>2</sub>Cl<sub>2</sub>): δ = - 3.1 (br), - 5.8 (br). HRMS (ESI): *m/z* calcd for C<sub>27</sub>H<sub>25</sub>AuB<sub>2</sub>N<sub>5</sub>: 638.1962[(*M-C<sub>7</sub>H<sub>7</sub>*)]<sup>+</sup>; found: 638.1968.

### **Synthesis of 5**

A dichloromethane (0.6 mL) solution of **4** (25 mg, 0.034mmol) was added HCl (ether solution, 2M, 18μL) at room temperature. After 5 minutes at room temperature, all volatiles were removed under vacuum to afford **5** as a grey solid (15 mg, 65%).

M. p.: 151 °C (dec). <sup>1</sup>H NMR (400 MHz, CD<sub>2</sub>Cl<sub>2</sub>): δ = 8.74 (d, *J* = 7.1 Hz, 2H, Ar-*H*), 7.54 (t, *J* = 7.4 Hz, 2H, Ar-*H*), 7.43 (dd, *J* = 14.8, 7.5 Hz, 2H, Ar-*H*), 7.36 (t, *J* = 7.4 Hz, 1H, Ar-*H*), 7.28-7.22 (m, 4H, Ar-*H*), 7.17 (d, *J* = 1.4 Hz, 1H, CH), 7.13-7.08 (m, 3H, Ar-*H*), 6.85-6.82 (m, 2H, Ar-*H* ×1, CH ×1), 6.72 (s, 1H, CH), 6.66 (s, 1H, CH), 3.24 (s, 3H, N-CH<sub>3</sub>), 3.03 (s, 3H, N-CH<sub>3</sub>); <sup>13</sup>C{<sup>1</sup>H} NMR (101 MHz, CD<sub>2</sub>Cl<sub>2</sub>): δ = 155.0 (Ar-C), 136.6 (Ar-CH), 134.9 (Ar-CH), 129.5 (Ar-CH), 128.8 (Ar-CH), 128.4 (Ar-CH), 128.3 (Ar-CH), 127.9 (Ar-CH), 127.8 (Ar-CH), 127.3 (Ar-CH), 125.9 (Ar-CH), 125. (Ar-CH), 122.6 (CH), 122.4(CH), 122.0 (CH), 121.6 (CH), 36.4 (N-CH<sub>3</sub>), 35.6 (N-CH<sub>3</sub>); <sup>11</sup>B{<sup>1</sup>H} NMR (128 MHz, CD<sub>2</sub>Cl<sub>2</sub>): δ = -2.7 (br), -6.2 (br). HRMS (ESI): *m/z* calcd for C<sub>27</sub>H<sub>25</sub>AuB<sub>2</sub>N<sub>5</sub>: 638.1962[(*M-Cl*)]<sup>+</sup>; found: 638.1964.

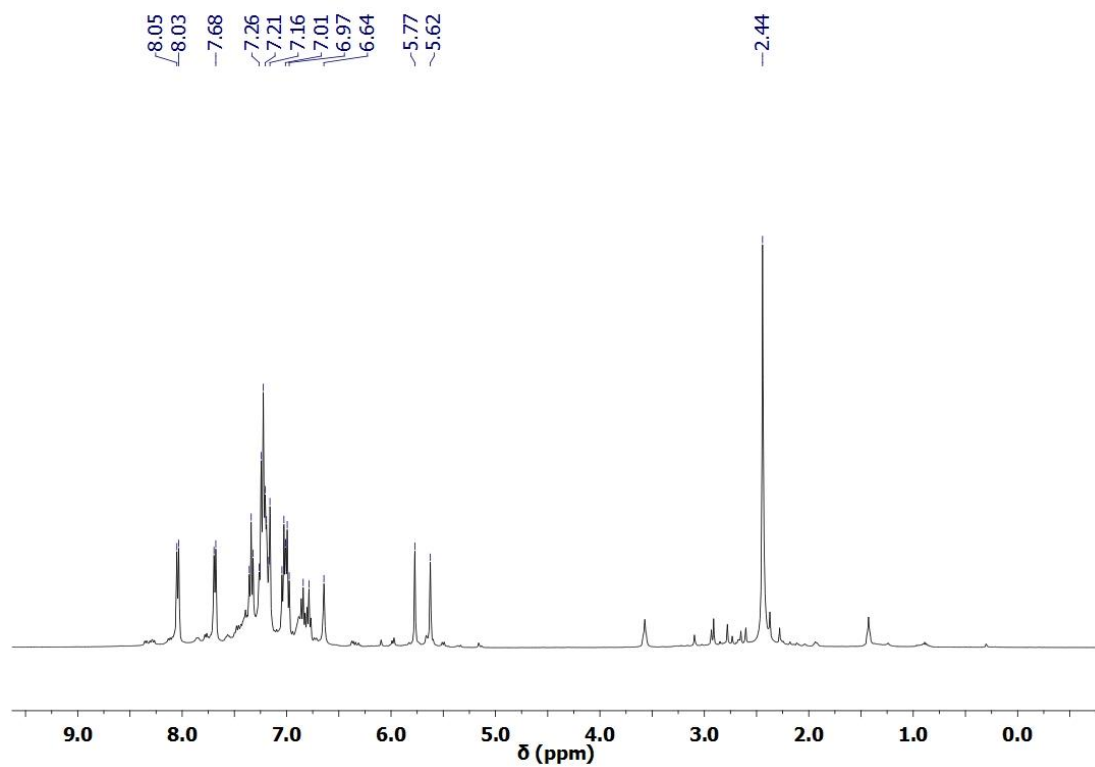

**Figure S1** Crude  $^1\text{H}$  NMR spectrum ( $\text{C}_6\text{D}_6$ ) of the reaction of **1** with two equivalents of phenyl isonitrile, indicating the formation of initial product.

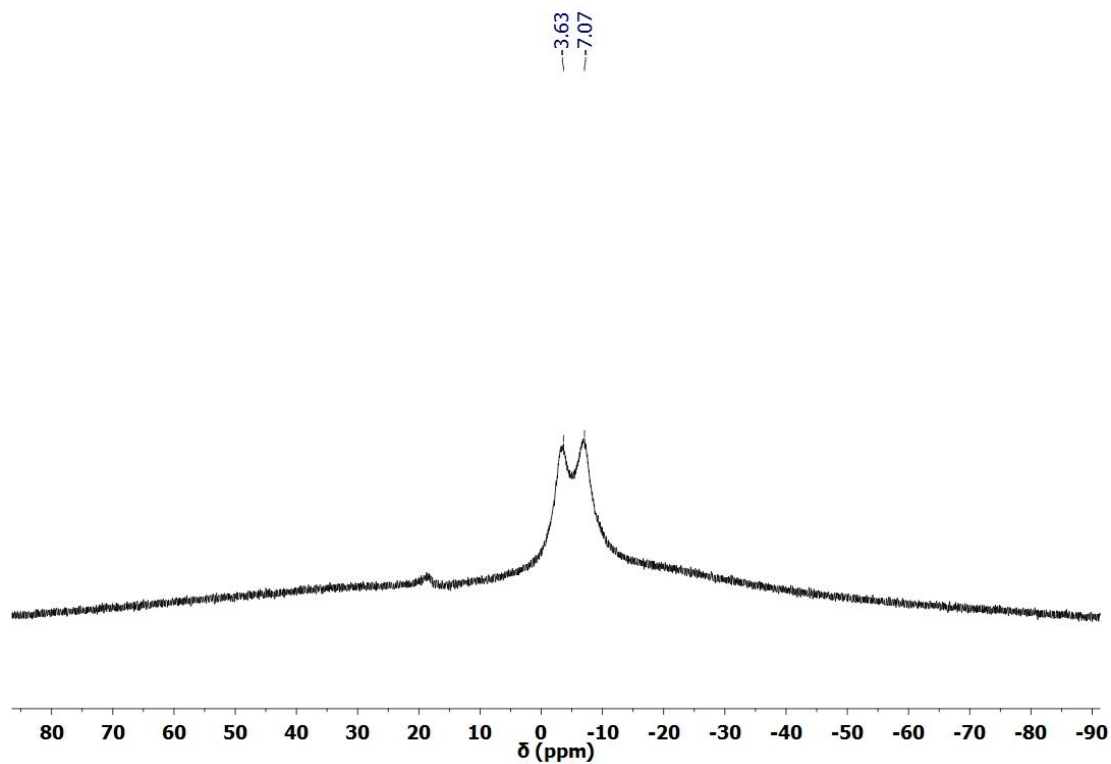

**Figure S2** Crude  $^{11}\text{B}$  NMR spectrum ( $\text{C}_6\text{D}_6$ ) of the reaction of **1** with two equivalents of phenyl isonitrile, indicating the formation of initial product.

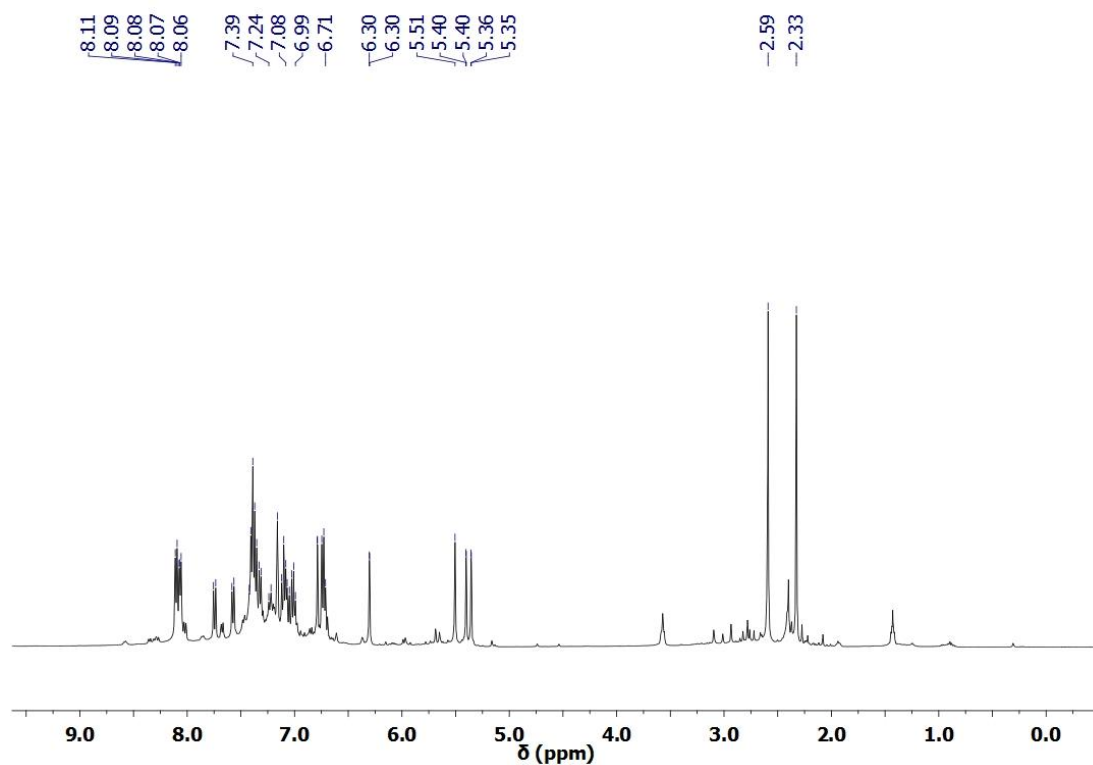

**Figure S3** Crude  $^1\text{H}$  NMR spectrum ( $\text{C}_6\text{D}_6$ ) of the reaction mixture of **1** and two equivalents of phenyl isonitrile, after 48 hours at room temperature.

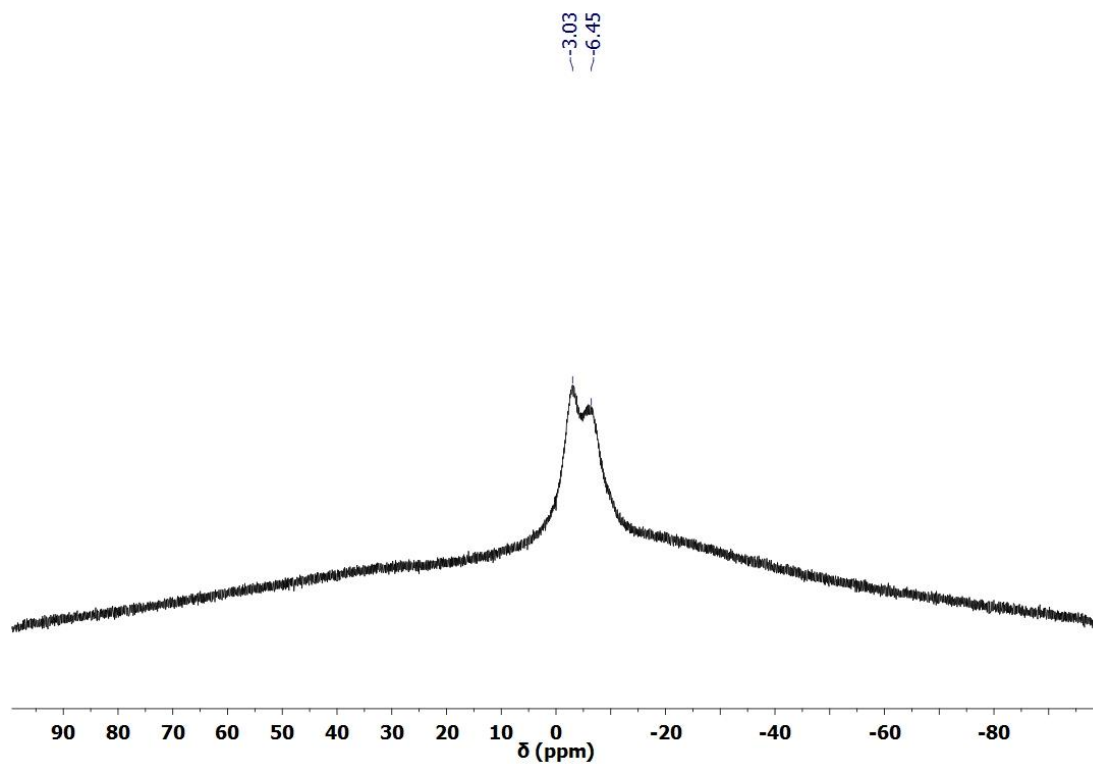

**Figure S4** Crude  $^{11}\text{B}$  NMR spectrum ( $\text{C}_6\text{D}_6$ ) of the reaction mixture of **1** and two equivalents phenyl isonitrile, after 48 hours at room temperature.

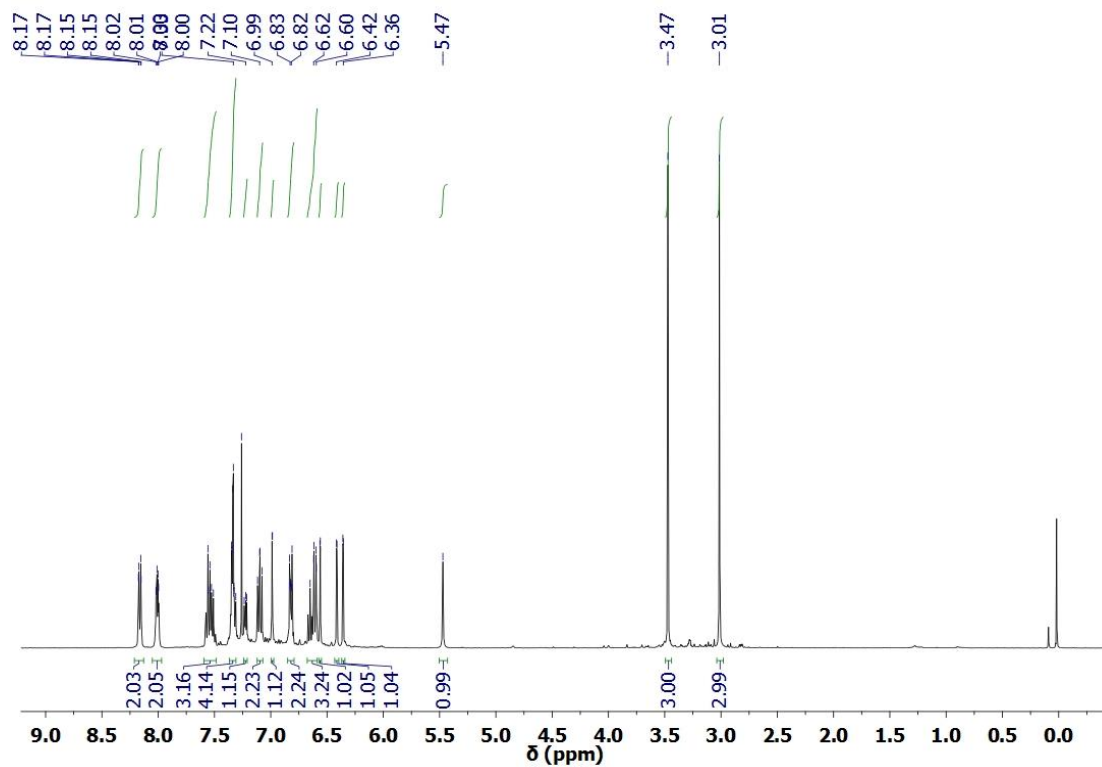

Figure S5  $^1\text{H}$  NMR spectrum ( $\text{CDCl}_3$ ) of **2**.

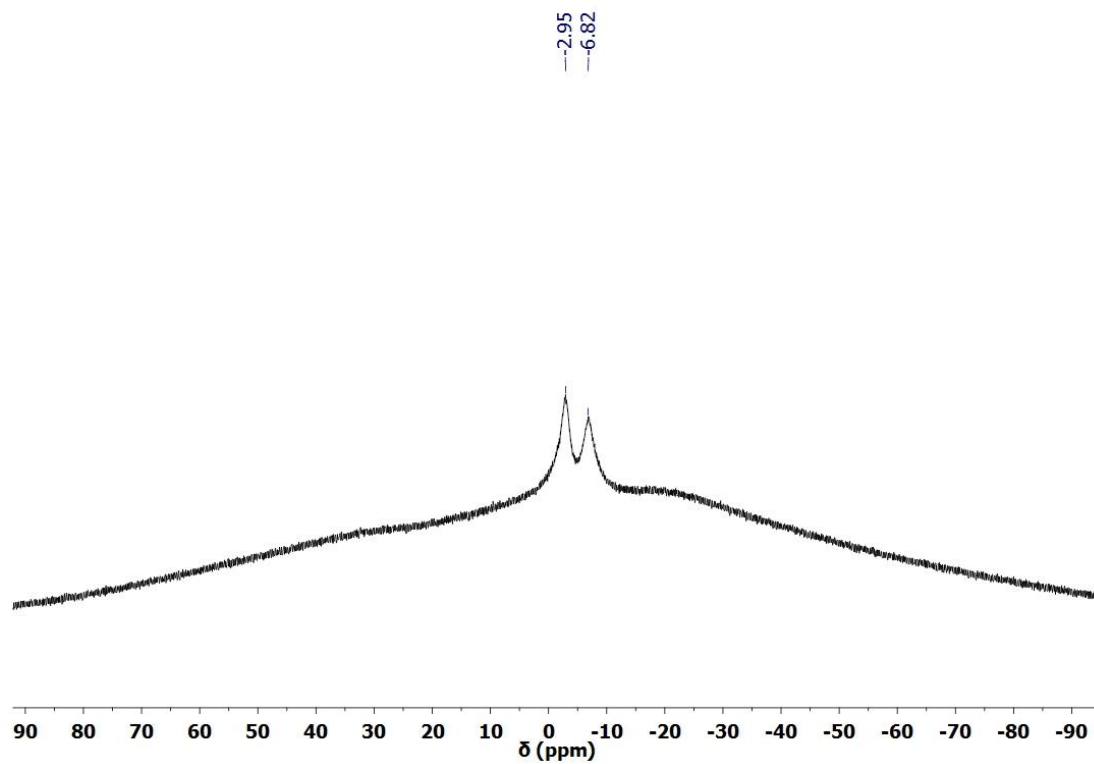

Figure S6  $^{11}\text{B}\{^1\text{H}\}$  NMR spectrum ( $\text{CDCl}_3$ ) of **2**.

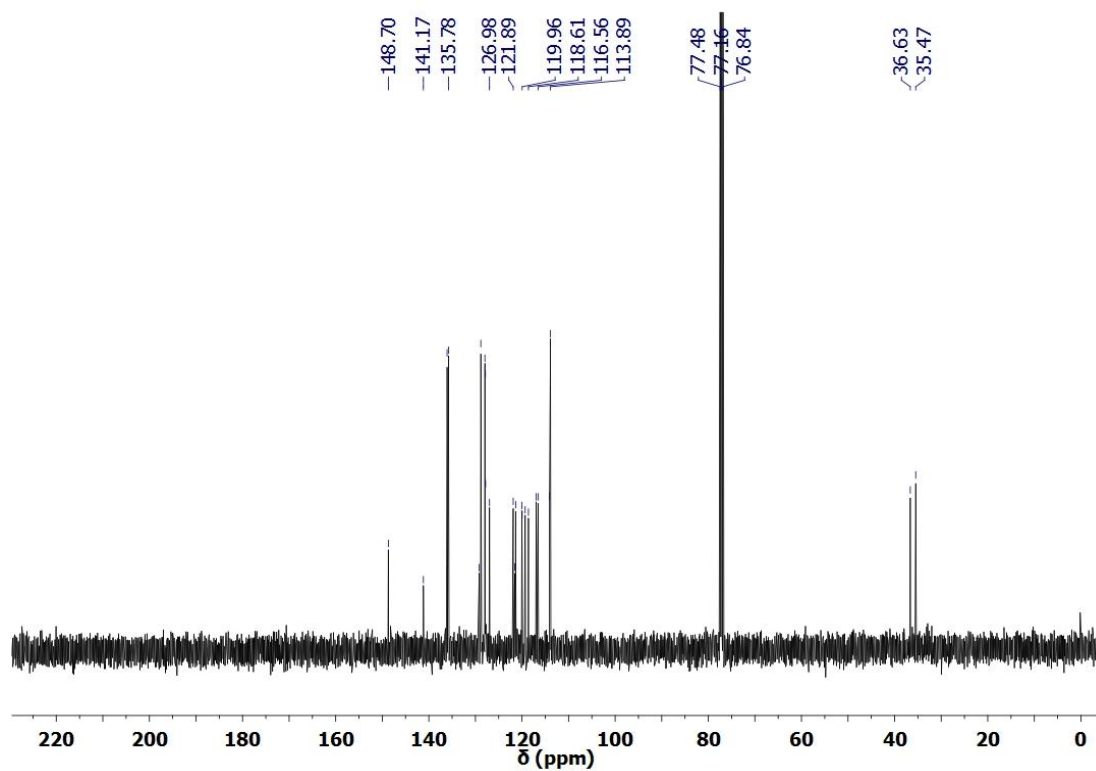

Figure S7  $^{13}\text{C}\{^1\text{H}\}$  NMR spectrum ( $\text{CDCl}_3$ ) of **2**.

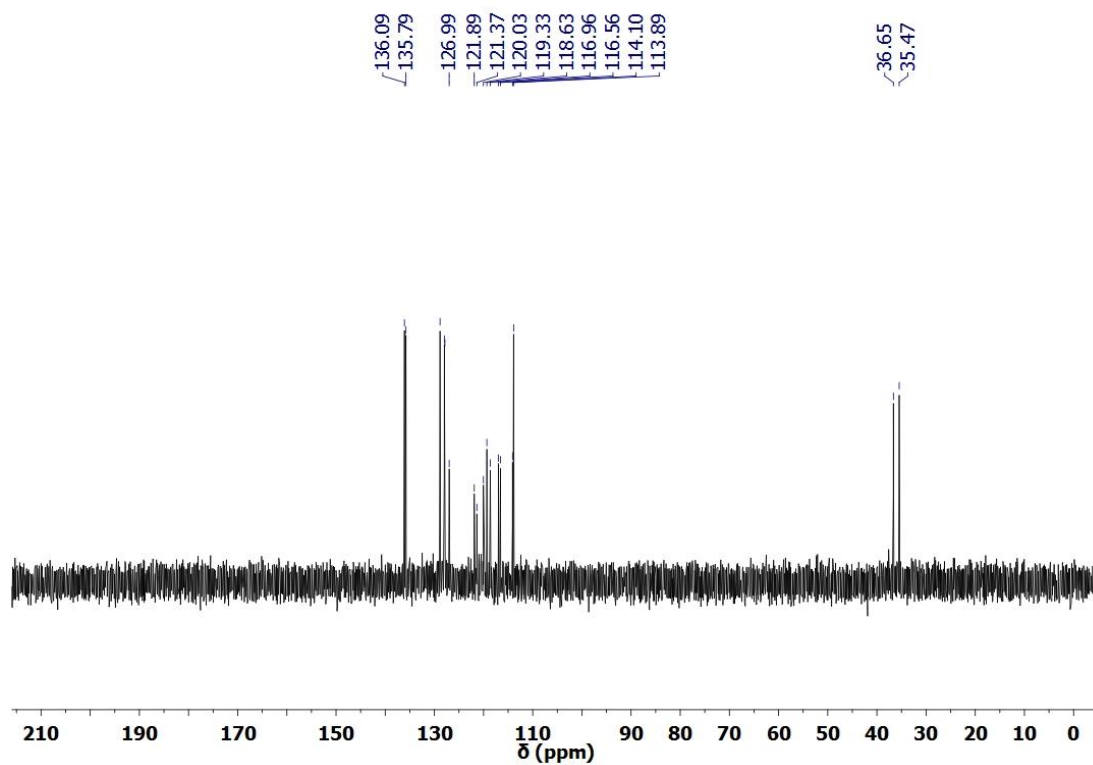

Figure S8  $^{13}\text{C}$  DEPT 135 NMR spectrum ( $\text{CDCl}_3$ ) of **2**.



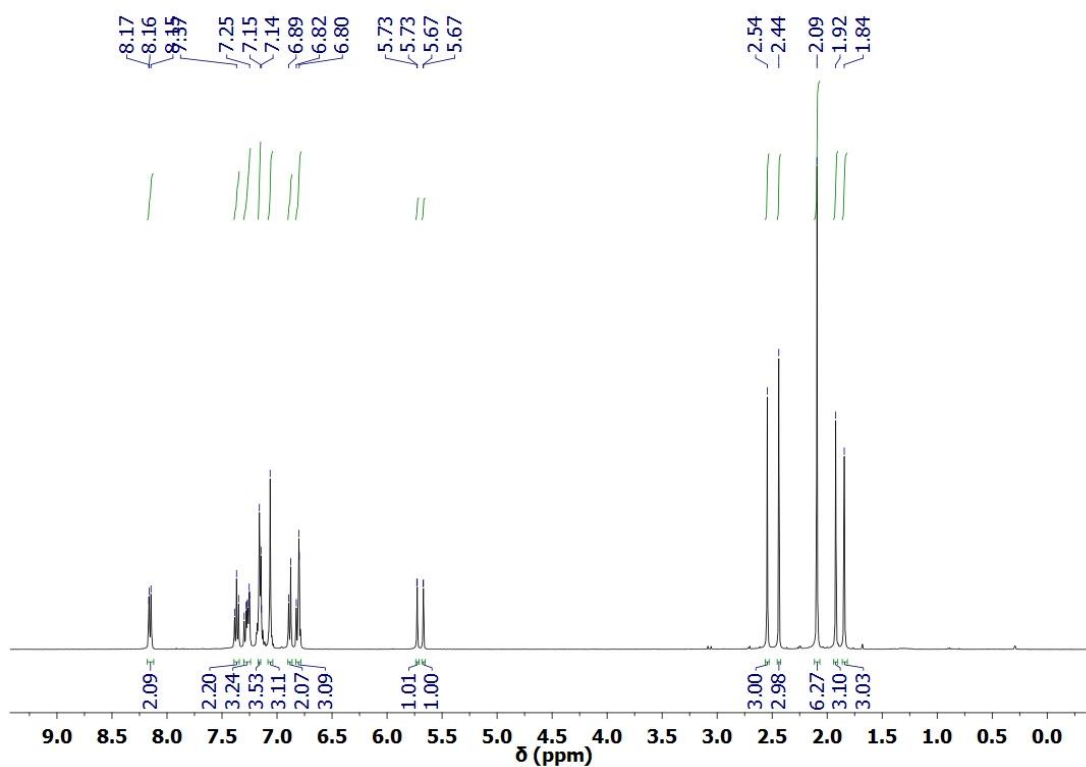

Figure S9  $^1\text{H}$  NMR spectrum ( $\text{C}_6\text{D}_6$ ) of **3**.

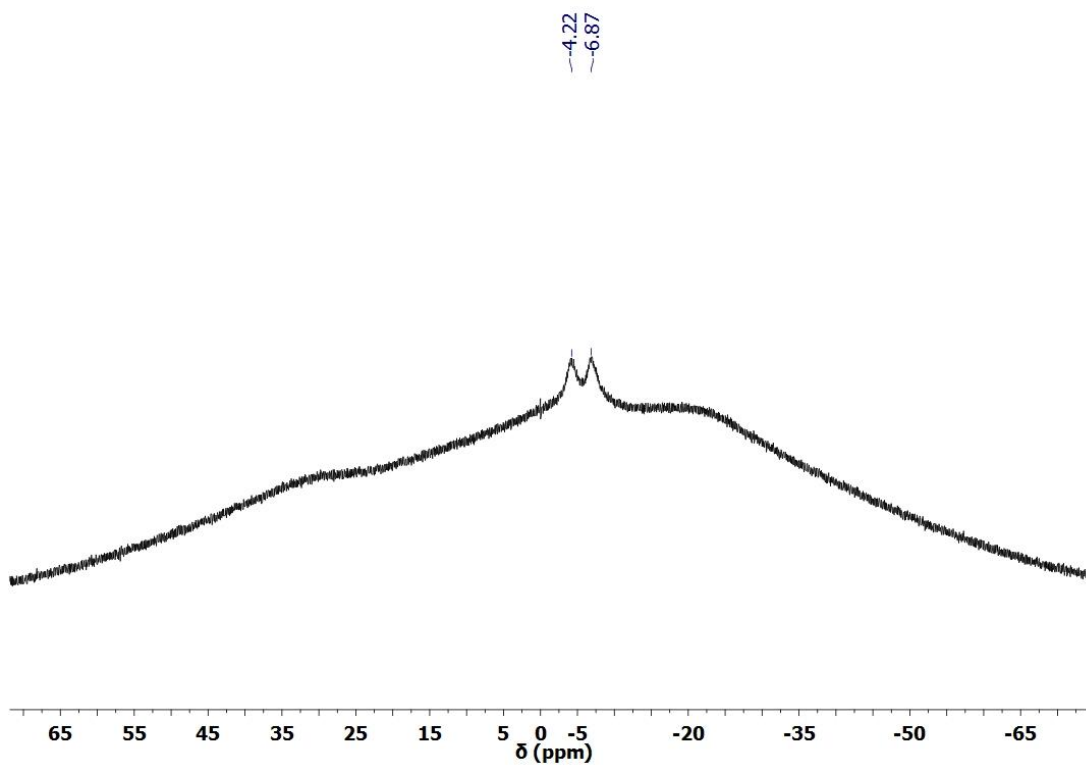

Figure S10  $^{11}\text{B}\{^1\text{H}\}$  NMR spectrum ( $\text{C}_6\text{D}_6$ ) of **3**.

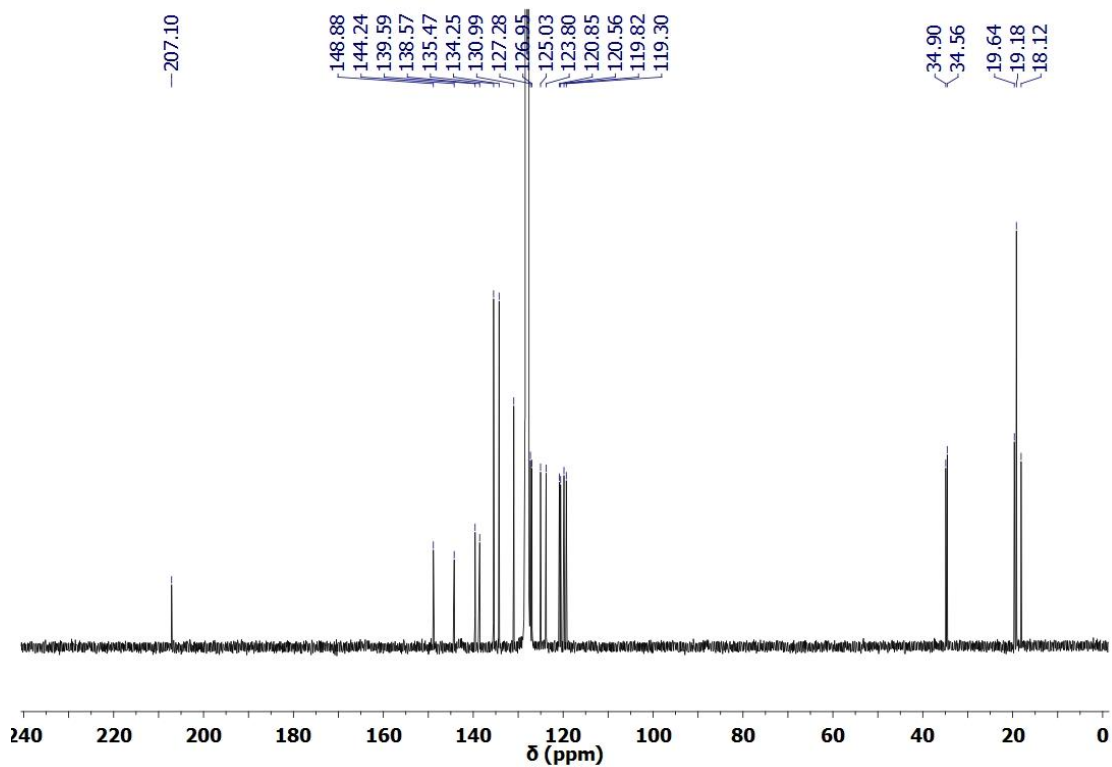

Figure S11  $^{13}\text{C}\{^1\text{H}\}$  NMR spectrum ( $\text{C}_6\text{D}_6$ ) of **3**.

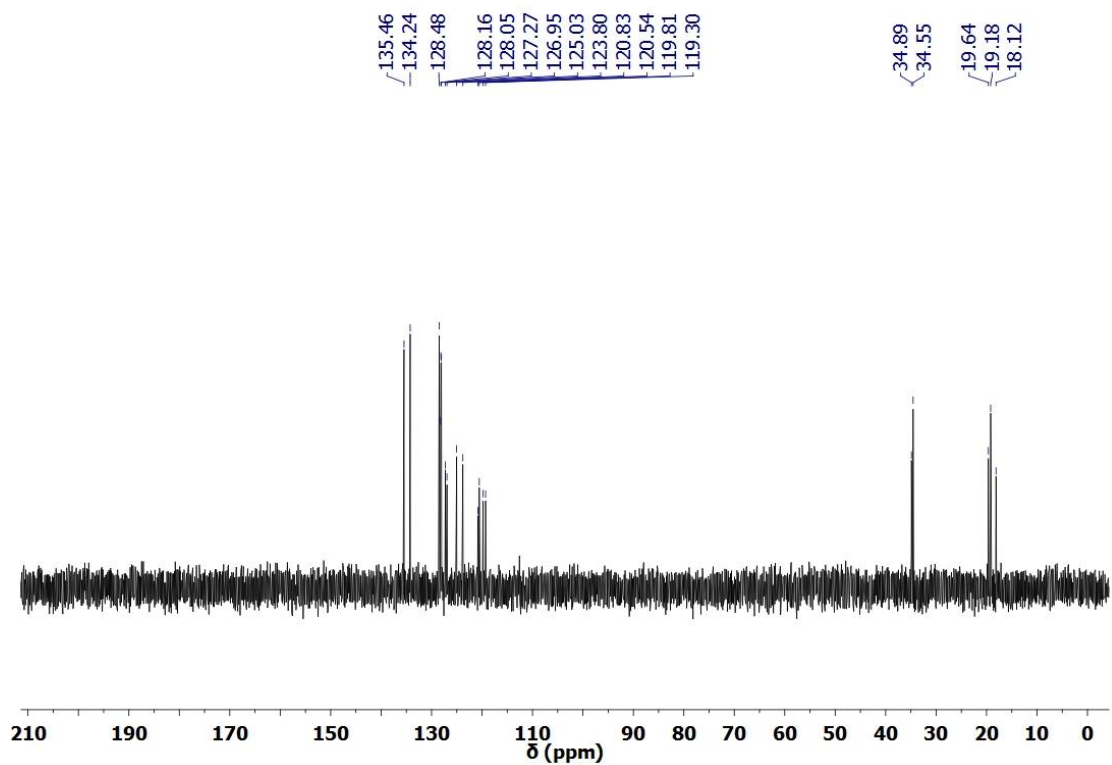

Figure S12  $^{13}\text{C}$  DEPT 135 NMR spectrum ( $\text{C}_6\text{D}_6$ ) of **3**.

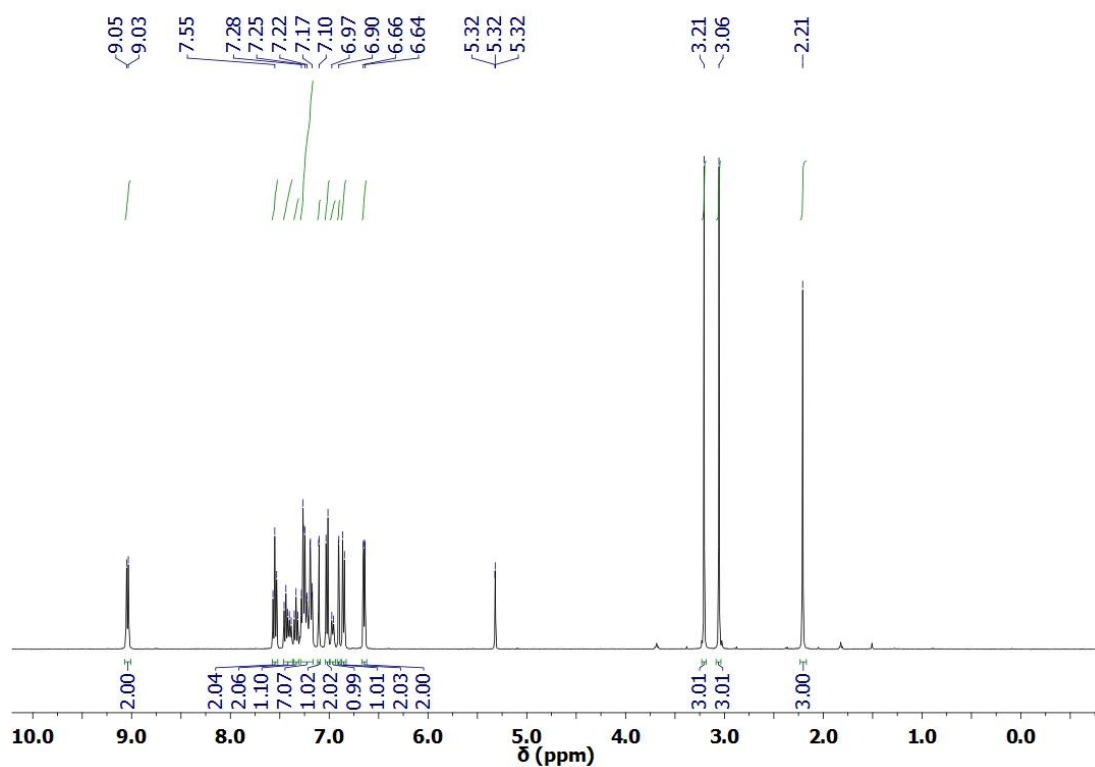

Figure S13  $^1\text{H}$  NMR spectrum ( $\text{CD}_2\text{Cl}_2$ ) of **4**.

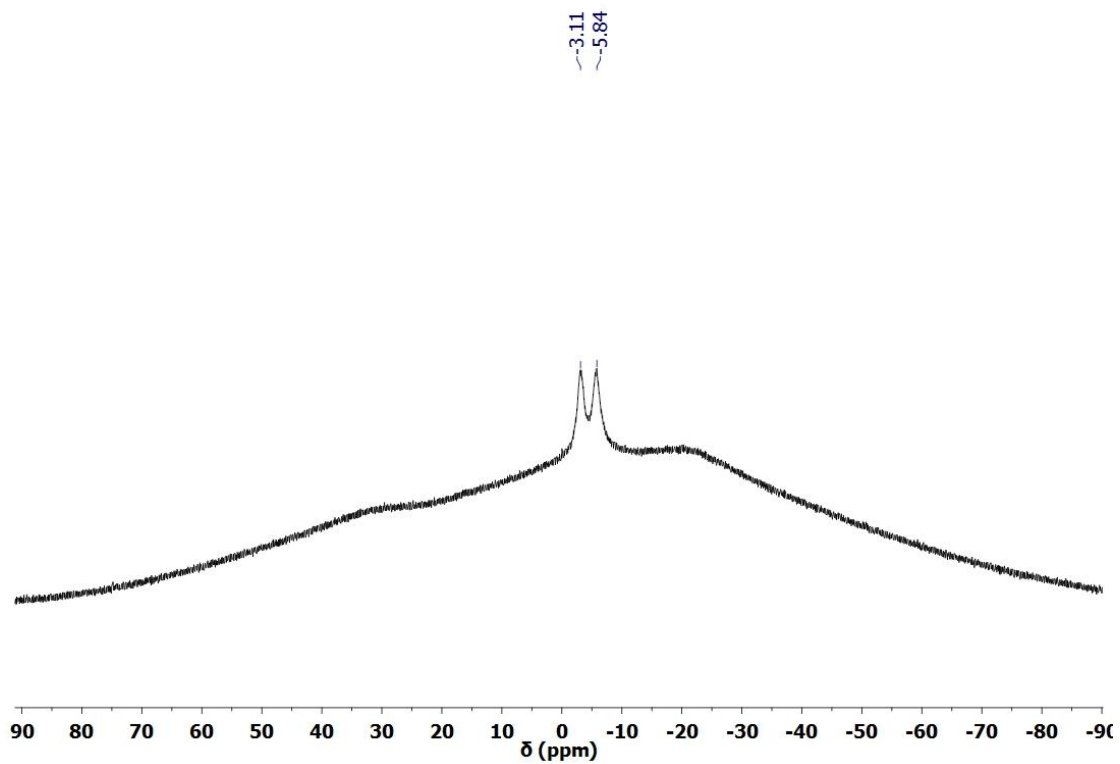

Figure S14  $^{11}\text{B}\{^1\text{H}\}$  NMR spectrum ( $\text{CD}_2\text{Cl}_2$ ) of **4**.

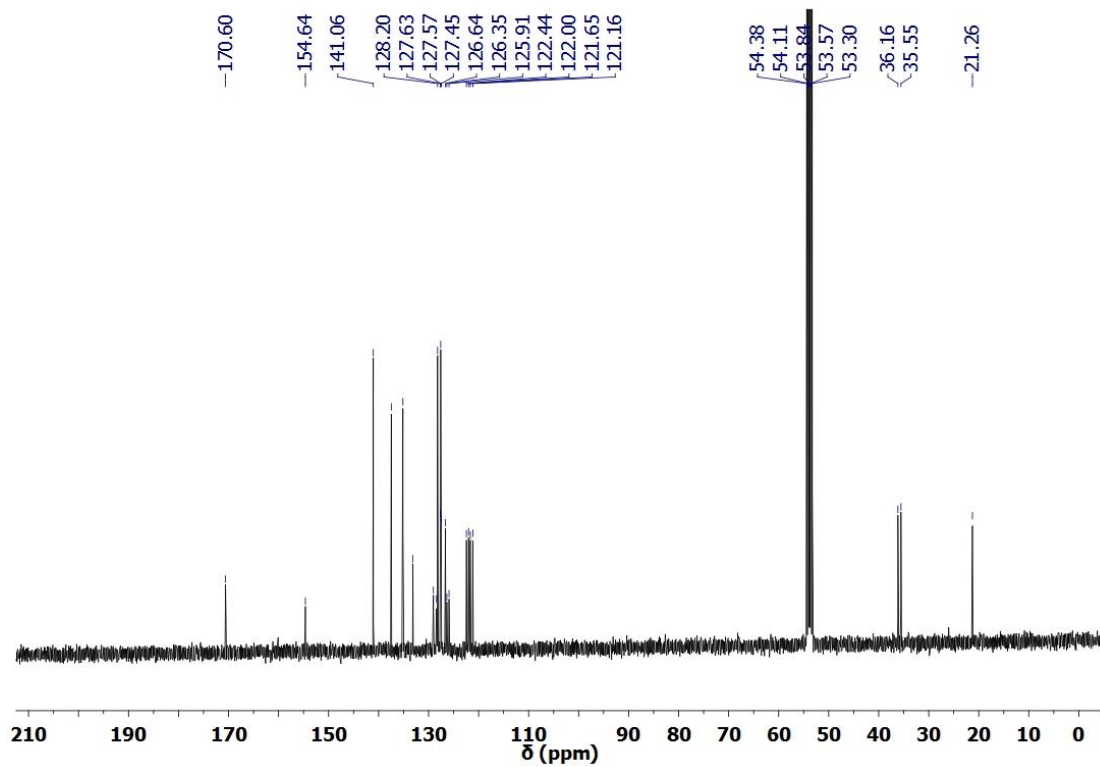

Figure S15  $^{13}\text{C}\{^1\text{H}\}$  NMR spectrum ( $\text{CD}_2\text{Cl}_2$ ) of **4**.

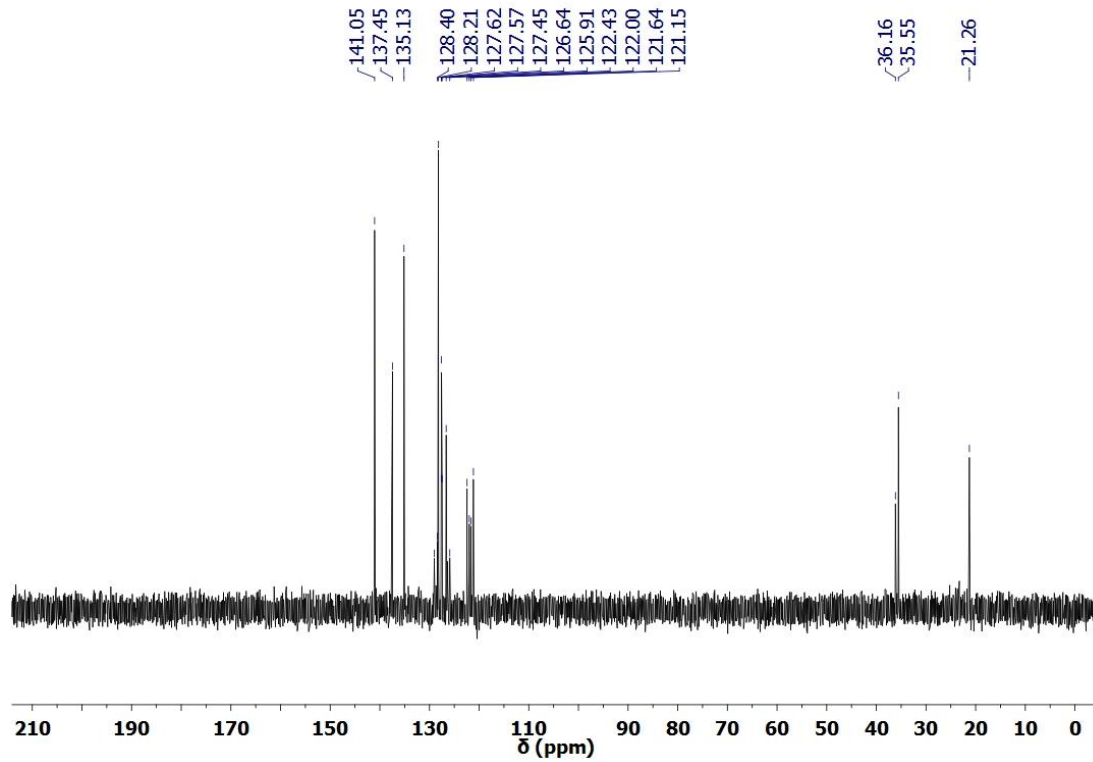

Figure S16  $^{13}\text{C}$  DEPT 135 NMR spectrum ( $\text{CD}_2\text{Cl}_2$ ) of **4**.

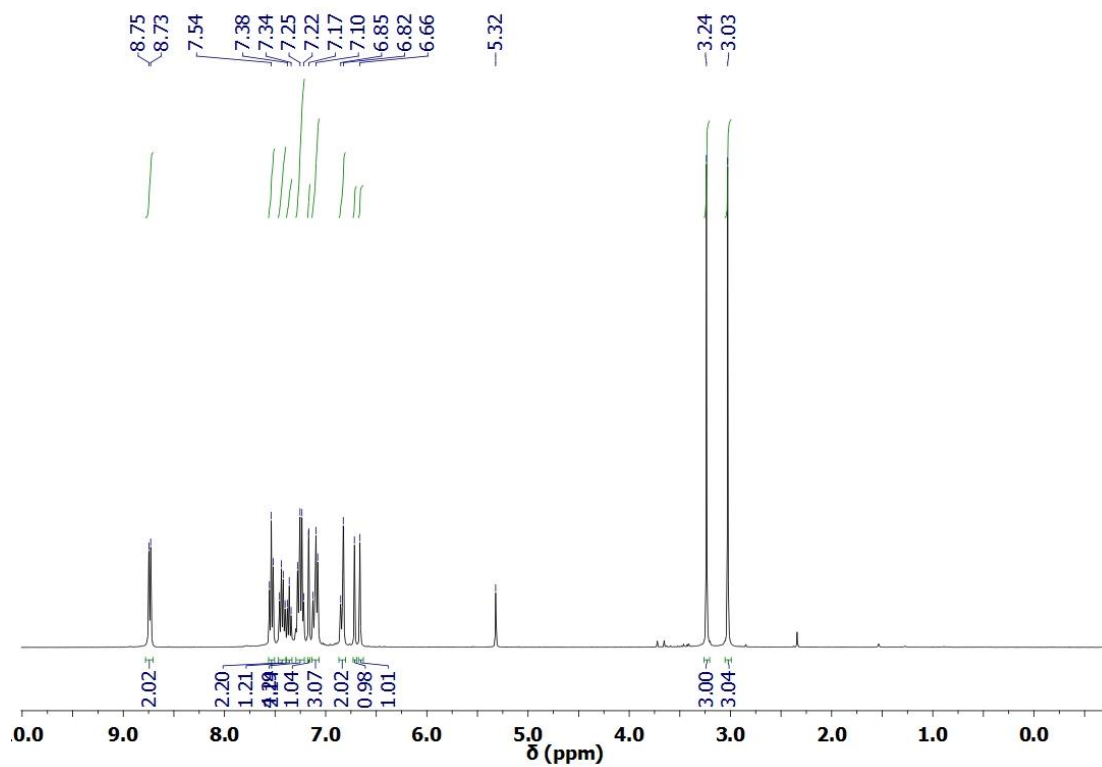

Figure S17  $^1\text{H}$  NMR spectrum ( $\text{CD}_2\text{Cl}_2$ ) of **5**.

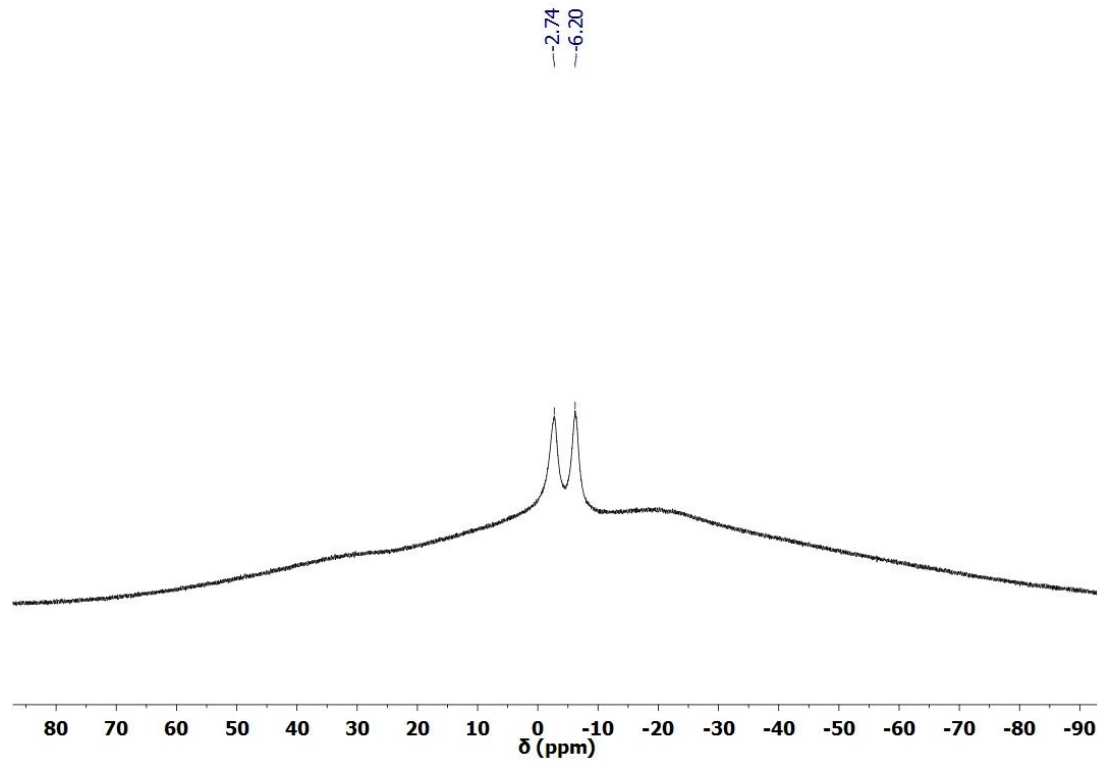

Figure S18  $^{11}\text{B}\{^1\text{H}\}$  NMR spectrum ( $\text{CD}_2\text{Cl}_2$ ) of **5**.

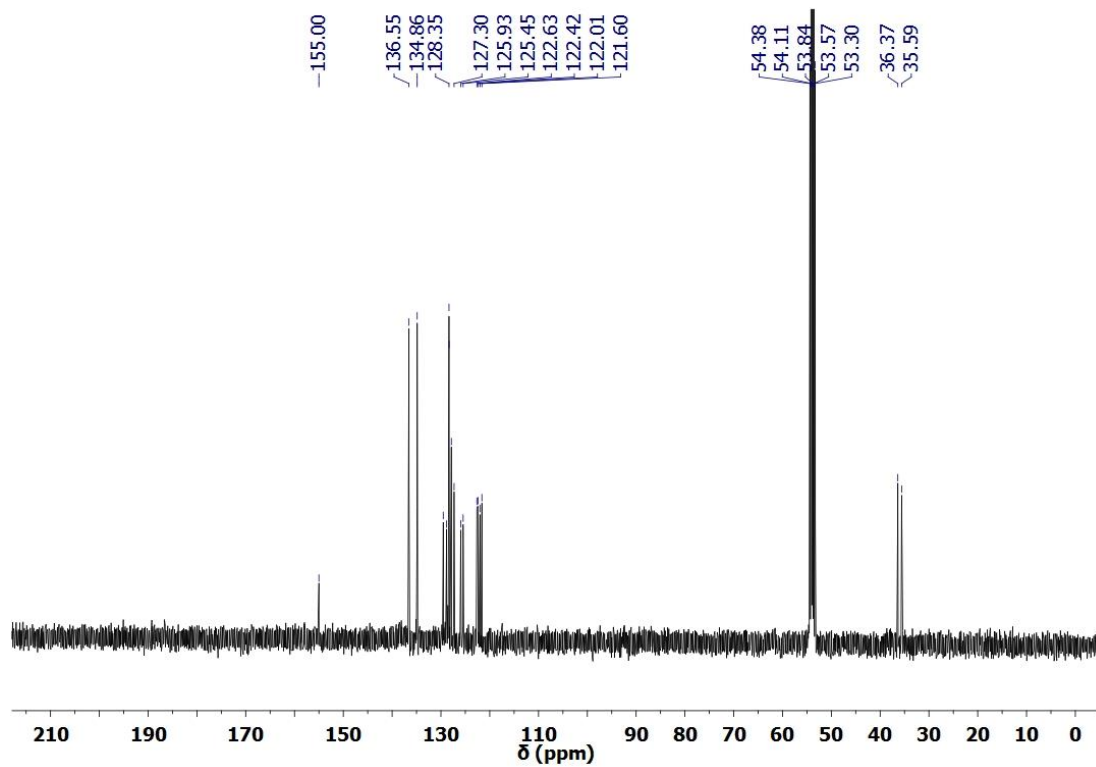

Figure S19  $^{13}\text{C}\{^1\text{H}\}$  NMR spectrum ( $\text{CD}_2\text{Cl}_2$ ) of 5.

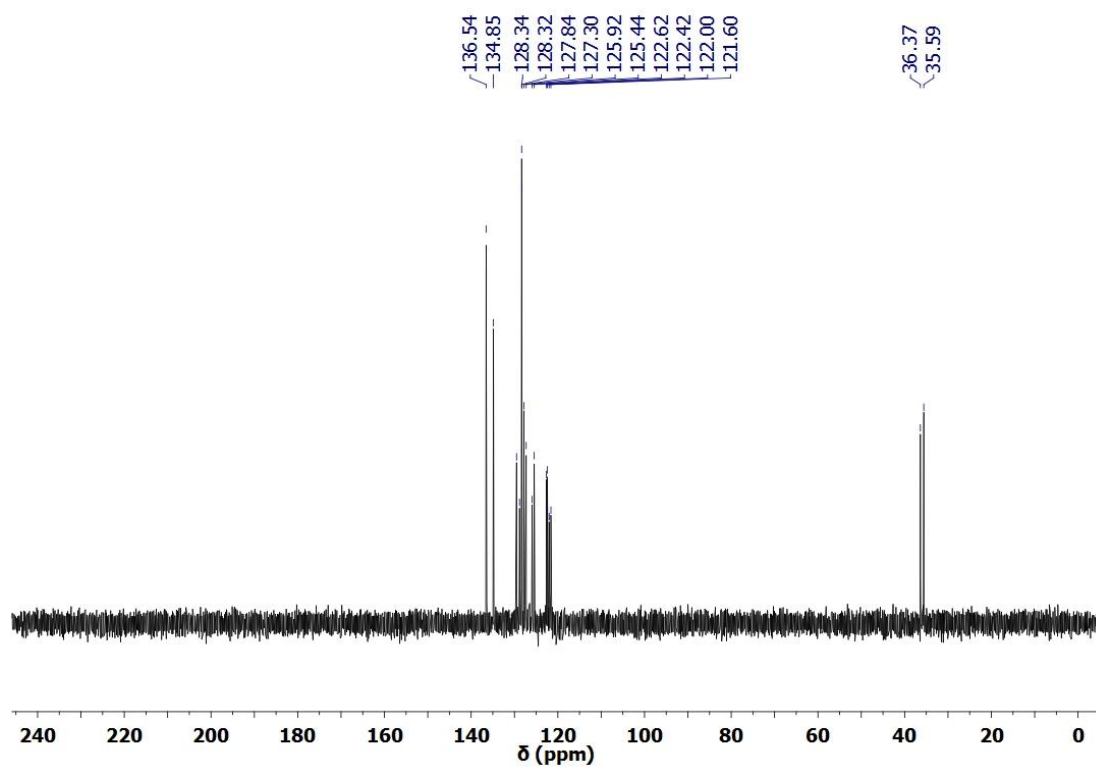

Figure S20  $^{13}\text{C}$  DEPT 135 NMR spectrum ( $\text{CD}_2\text{Cl}_2$ ) of 5.

### Preliminary catalytic study of **5**

With B,N-carbene gold (I) complex **5** in hand, a catalytic activity of **5** on alkylidene oxazoles synthesis was briefly investigated.

The catalytic reaction was carried out in a J-Young NMR tube at room temperature and monitored by NMR spectroscopy. Substrates **6** and **8** were slowly converted to the corresponding alkylidene oxazoles **7** and **9**, respectively. Meanwhile, when 1-naphthalenyl propargyl ether **10** was employed, the desired product **11** was not detected and a complex mixture was obtained.

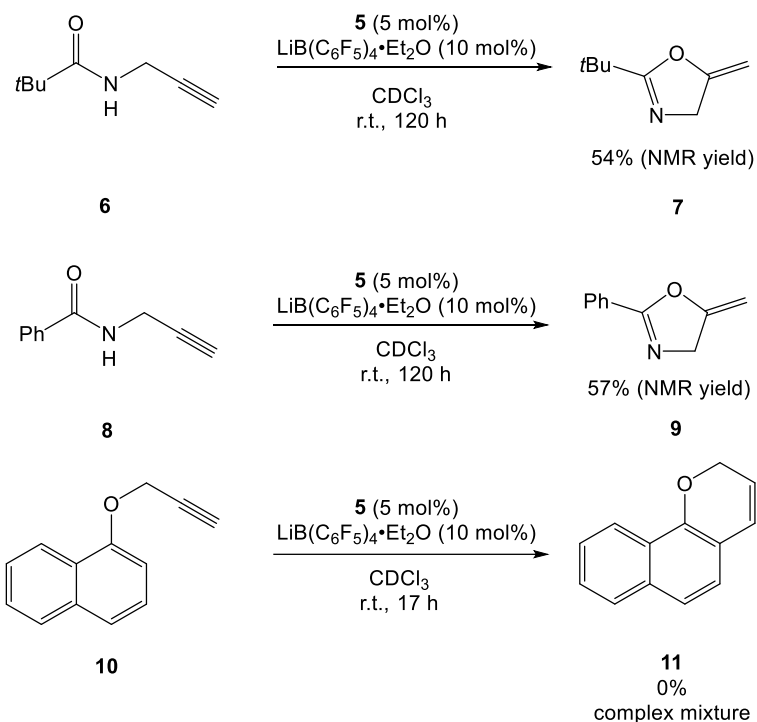

Reaction conditions: **6** (0.1 mmol), **8** (0.087 mmol), **10** (0.1 mmol); CDCl<sub>3</sub> (0.25 mL). Yields were determined by <sup>1</sup>H NMR spectroscopy using 1,3,5-trimethoxy benzene as an internal standard.

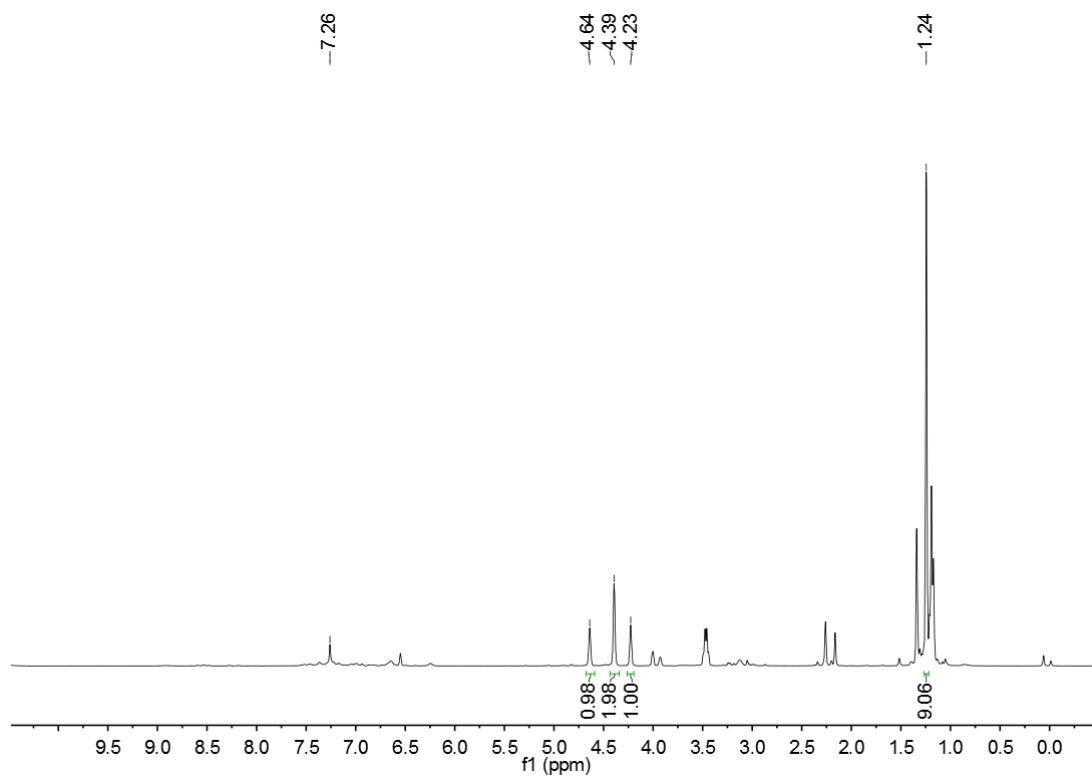

**Figure S21**  $^1\text{H}$  NMR spectrum ( $\text{CDCl}_3$ ) of the reaction mixture of **6**, **5** (5 mol%) and  $\text{LiB}(\text{B}_6\text{F}_5)_4 \cdot \text{Et}_2\text{O}$  (10 mol%) after 120 h at room temperature.

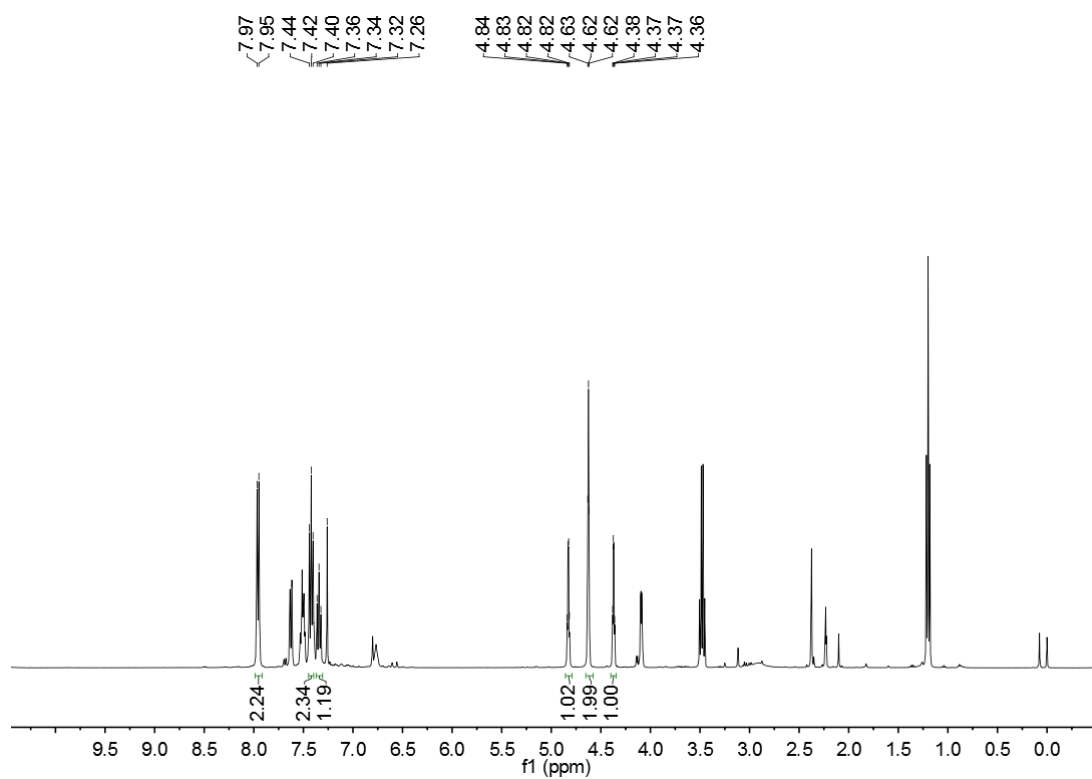

**Figure S22**  $^1\text{H}$  NMR spectrum ( $\text{CDCl}_3$ ) of the reaction mixture of **8**, **5** (5 mol%) and  $\text{LiB}(\text{B}_6\text{F}_5)_4 \cdot \text{Et}_2\text{O}$  (10 mol%) after 120 h at room temperature.



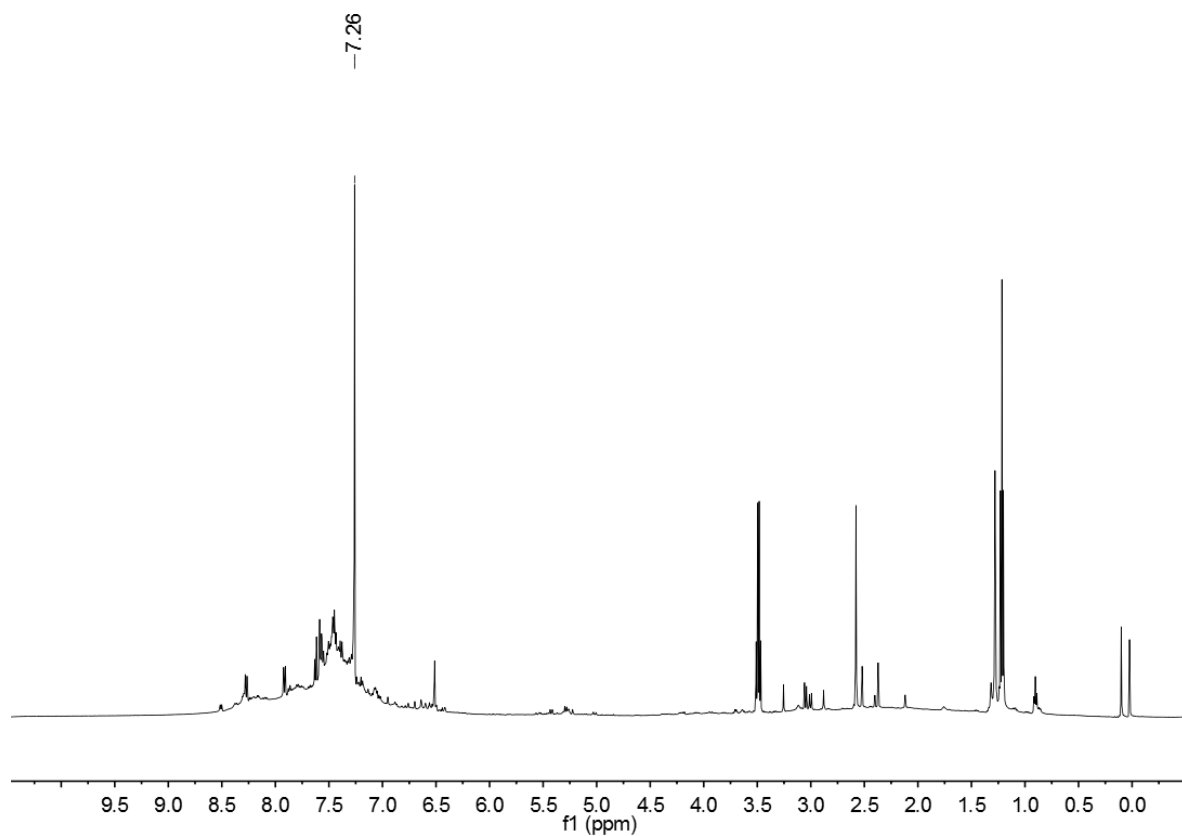

**Figure S23**  $^1\text{H}$  NMR spectrum ( $\text{CDCl}_3$ ) of the reaction mixture of **10**, **5** (5 mol%) and  $\text{LiB}(\text{B}_6\text{F}_5)_4 \cdot \text{Et}_2\text{O}$  (10 mol%) after 17 h at room temperature.

## 2. Crystal structural parameters

**Crystallographic Methods:** X-ray data collection and structural refinement. Intensity data for compounds **2**, **3**, **4** and **5** were collected using a Bruker APEX II diffractometer. The crystals of **2**, **3**, **4** and **5** were measured at 103(2) K, 100(2) K, 133(2) K and 103(2) K respectively. The structure was solved by direct phase determination (SHELXS-2014) and refined for all data by full-matrix least squares methods on  $F^2$ .<sup>[S3,S4]</sup> All non-hydrogen atoms were subjected to anisotropic refinement. The hydrogen atoms were generated geometrically and allowed to ride in their respective parent atoms; they were assigned appropriate isotropic thermal parameters and included in the structure-factor calculations. CCDC: 1948002-1948005 contains the supplementary crystallographic data for this paper. The data can be obtained free of charge from the Cambridge Crystallography Data Center via [www.ccdc.cam.ac.uk/data\\_request/cif](http://www.ccdc.cam.ac.uk/data_request/cif).

**Supplementary Table 1.** Crystal data and structure refinement of **2-5**.

| Compounds                 | <b>2</b> ·C <sub>6</sub> H <sub>6</sub>                       | <b>3</b>                                                      | <b>4</b>                                                        | <b>5</b> ·C <sub>6</sub> D <sub>6</sub>                                          |
|---------------------------|---------------------------------------------------------------|---------------------------------------------------------------|-----------------------------------------------------------------|----------------------------------------------------------------------------------|
| Formula                   | C <sub>40</sub> H <sub>36</sub> B <sub>2</sub> N <sub>6</sub> | C <sub>38</sub> H <sub>38</sub> B <sub>2</sub> N <sub>6</sub> | C <sub>34</sub> H <sub>32</sub> AuB <sub>2</sub> N <sub>5</sub> | C <sub>33</sub> H <sub>25</sub> AuB <sub>2</sub> ClD <sub>6</sub> N <sub>5</sub> |
| Fw                        | 622.37                                                        | 600.36                                                        | 729.23                                                          | 757.70                                                                           |
| Cryst syst                | monoclinic                                                    | monoclinic                                                    | monoclinic                                                      | monoclinic                                                                       |
| Space group               | <i>P</i> 2 <sub>1</sub> / <i>c</i>                            | <i>P</i> 2 <sub>1</sub> / <i>n</i>                            | <i>P</i> 2 <sub>1</sub> / <i>n</i>                              | <i>P</i> 2 <sub>1</sub> / <i>n</i>                                               |
| Size (mm <sup>3</sup> )   | 0.260 x 0.320 x<br>0.360                                      | 0.040 x 0.120 x<br>0.240                                      | 0.040 x 0.060 x<br>0.200                                        | 0.140 x 0.200 x<br>0.340                                                         |
| T, K                      | 103(2)                                                        | 100(2)                                                        | 133(2)                                                          | 103(2)                                                                           |
| <i>a</i> , Å              | 11.2990(18)                                                   | 8.9487(3)                                                     | 12.1073(2)                                                      | 13.2614(6)                                                                       |
| <i>b</i> , Å              | 11.6148(18)                                                   | 20.3068(7)                                                    | 11.2713(2)                                                      | 11.0676(5)                                                                       |
| <i>c</i> , Å              | 25.321(4)                                                     | 17.8492(8)                                                    | 21.9583(4)                                                      | 21.3350(9)                                                                       |
| $\alpha$ , deg            | 90                                                            | 90                                                            | 90                                                              | 90                                                                               |
| $\beta$ , deg             | 102.163(4)                                                    | 97.5939(14)                                                   | 98.2737(8)                                                      | 100.4820(15)                                                                     |
| $\gamma$ , deg            | 90                                                            | 90                                                            | 90                                                              | 90                                                                               |
| <i>V</i> , Å <sup>3</sup> | 3248.4(9)                                                     | 3215.1(2)                                                     | 2965.35(9)                                                      | 3079.1(2)                                                                        |
| Z                         | 4                                                             | 4                                                             | 4                                                               | 4                                                                                |

---

|                                                               |                 |                 |                 |                 |
|---------------------------------------------------------------|-----------------|-----------------|-----------------|-----------------|
| $d_{\text{calcd}} \text{ g}\cdot\text{cm}^{-3}$               | 1.273           | 1.240           | 1.633           | 1.634           |
| $\chi^2/\text{mm}^{-1}$                                       | 0.076           | 0.074           | 9.567           | 4.896           |
| Refl collected                                                | 26885           | 7156            | 30853           | 44118           |
| $T_{\text{max}}/T_{\text{min}}$                               | 0.9810 / 0.9730 | 0.9970 / 0.9830 | 0.7010 / 0.2510 | 0.5470 / 0.2870 |
| $N_{\text{measd}}$                                            | 7780            | 7156            | 5210            | 5464            |
| $[R_{\text{int}}]$                                            | 0.0581          | 0.0661          | 0.0525          | 0.0821          |
| $R [I > 2\sigma(I)]$                                          | 0.0709          | 0.0545          | 0.0308          | 0.0313          |
| $R_w [I > 2\sigma(I)]$                                        | 0.1362          | 0.1350          | 0.0865          | 0.0663          |
| GOF                                                           | 1.130           | 1.097           | 1.095           | 1.046           |
| Largest diff.<br>peak/hole [ $\text{e}\cdot\text{\AA}^{-3}$ ] | 0.298 / -0.257  | 0.333 / -0.302  | 0.782 / -1.743  | 2.008 / -0.773  |

---

### 3. Theoretical calculations

Gaussian 09<sup>[55]</sup> was used for all density functional theory (DFT) calculations including geometry optimization, frequency calculation. Optimization, frequency for **A-E** were performed at the M052X/6-311G(d,p) level of theory.

#### 3.1 Optimized structure of **A** (atom, x-, y-, z-positions in Å)

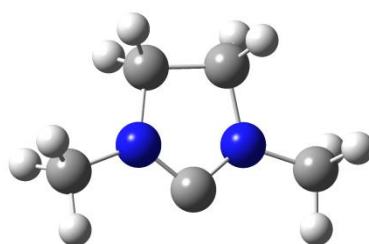

|                                              |                             |
|----------------------------------------------|-----------------------------|
| Zero-point correction=                       | 0.151321 (Hartree/Particle) |
| Thermal correction to Energy=                | 0.159025                    |
| Thermal correction to Enthalpy=              | 0.159969                    |
| Thermal correction to Gibbs Free Energy=     | 0.119457                    |
| Sum of electronic and zero-point Energies=   | -305.878353                 |
| Sum of electronic and thermal Energies=      | -305.870649                 |
| Sum of electronic and thermal Enthalpies=    | -305.869705                 |
| Sum of electronic and thermal Free Energies= | -305.910217                 |

**Supplementary Table 2.** Calculated geometries of **A** (atom, x-, y-, z-positions in Å)

|   |             |             |             |
|---|-------------|-------------|-------------|
| C | -0.75981469 | 1.22540993  | -0.08476640 |
| C | 0.75988596  | 1.22536701  | 0.08476284  |
| N | 1.06587846  | -0.19936281 | -0.09101960 |
| C | -0.00002946 | -1.01173968 | -0.00004439 |
| N | -1.06588832 | -0.19931369 | 0.09087959  |
| C | -2.42924585 | -0.65963019 | 0.00555834  |
| C | 2.42920984  | -0.65965441 | -0.00547778 |
| H | -1.06240867 | 1.55569849  | -1.08343058 |
| H | -1.27451722 | 1.83779897  | 0.65498062  |
| H | 1.06240466  | 1.55546270  | 1.08352247  |
| H | 1.27469056  | 1.83783520  | -0.65484057 |
| H | -2.42123091 | -1.73876955 | 0.12500894  |
| H | -2.87233282 | -0.40808376 | -0.96321237 |
| H | -3.03859254 | -0.21040561 | 0.79257186  |
| H | 2.42107917  | -1.73896155 | -0.12341472 |
| H | 2.87251434  | -0.40676706 | 0.96284859  |
| H | 3.03842757  | -0.21158837 | -0.79324979 |

---

### 3.2 optimized structure of B (atom, x-, y-, z-positions in Å)

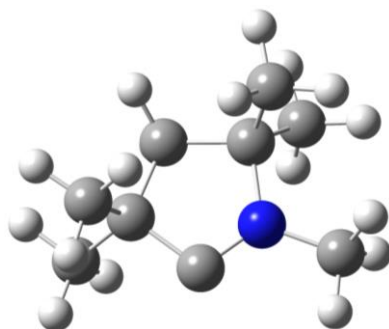

|                                              |                             |
|----------------------------------------------|-----------------------------|
| Zero-point correction=                       | 0.247610 (Hartree/Particle) |
| Thermal correction to Energy=                | 0.259039                    |
| Thermal correction to Enthalpy=              | 0.259983                    |
| Thermal correction to Gibbs Free Energy=     | 0.212052                    |
| Sum of electronic and zero-point Energies=   | -407.687434                 |
| Sum of electronic and thermal Energies=      | -407.676006                 |
| Sum of electronic and thermal Enthalpies=    | -407.675061                 |
| Sum of electronic and thermal Free Energies= | -407.722992                 |

**Supplementary Table 3.** Calculated geometries of **B** (atom, x-, y-, z-positions in Å)

|   |             |             |             |
|---|-------------|-------------|-------------|
| C | -0.44887285 | 1.10611696  | -0.43867757 |
| C | 0.94661270  | 0.56489631  | -0.09750801 |
| N | 0.64705034  | -0.89468979 | 0.06723508  |
| C | -0.59776453 | -1.28294560 | 0.10773634  |
| C | -1.43345785 | -0.02271596 | -0.04788478 |
| C | -2.50309711 | -0.24512754 | -1.11681423 |
| C | -2.11687375 | 0.23745039  | 1.30087047  |
| C | 1.75326818  | -1.83263451 | 0.21013222  |
| C | 1.49663529  | 1.13809498  | 1.20953668  |
| C | 1.94784231  | 0.78825536  | -1.22753358 |
| H | -0.51348431 | 1.29913587  | -1.51111392 |
| H | -0.65297064 | 2.04301387  | 0.08107058  |
| H | -3.15471723 | -1.06858448 | -0.82622337 |
| H | -2.04631940 | -0.49636157 | -2.07515647 |
| H | -3.10587052 | 0.65702826  | -1.24560755 |
| H | -2.72591383 | -0.62210158 | 1.57942177  |
| H | -2.75870717 | 1.11827692  | 1.23042902  |
| H | -1.38853555 | 0.40409905  | 2.09504015  |
| H | 1.31740244  | -2.80792193 | 0.39526620  |
| H | 2.39350501  | -1.54815681 | 1.04529829  |
| H | 2.35036110  | -1.86144870 | -0.70111661 |

|   |            |            |             |
|---|------------|------------|-------------|
| H | 2.45081920 | 0.68138398 | 1.47371484  |
| H | 0.79602774 | 0.98010747 | 2.02800543  |
| H | 1.66119035 | 2.21010332 | 1.09455786  |
| H | 2.94280889 | 0.42797702 | -0.96326544 |
| H | 2.02337297 | 1.85613046 | -1.43546002 |
| H | 1.61592424 | 0.28180503 | -2.13465153 |

### 3.3 Optimized structure of C (atom, x-, y-, z-positions in Å)

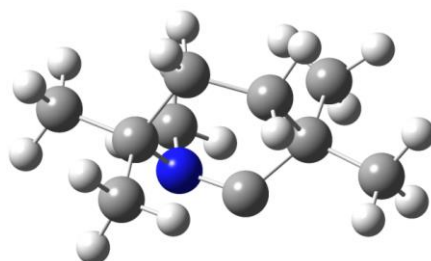

|                                              |                             |
|----------------------------------------------|-----------------------------|
| Zero-point correction=                       | 0.275817 (Hartree/Particle) |
| Thermal correction to Energy=                | 0.287813                    |
| Thermal correction to Enthalpy=              | 0.288757                    |
| Thermal correction to Gibbs Free Energy=     | 0.240142                    |
| Sum of electronic and zero-point Energies=   | -446.893379                 |
| Sum of electronic and thermal Energies=      | -446.881383                 |
| Sum of electronic and thermal Enthalpies=    | -446.880439                 |
| Sum of electronic and thermal Free Energies= | -446.929054                 |

**Supplementary Table 4.** Calculated geometries of C (atom, x-, y-, z-positions in Å)

|   |             |             |             |
|---|-------------|-------------|-------------|
| C | -1.49299127 | -0.26444928 | 0.01061821  |
| N | -0.58955683 | 0.57490763  | -0.83789227 |
| C | 0.50060595  | -0.22542318 | -1.04856296 |
| C | 1.64357978  | -0.06934332 | -0.11820947 |
| C | 0.81873110  | -0.97416386 | 0.95200496  |
| C | -0.62375447 | -0.53887624 | 1.27886138  |
| C | -0.51586958 | 1.99416003  | -0.45201316 |
| C | -1.88892645 | -1.55941627 | -0.69902113 |
| C | -2.76968000 | 0.48777734  | 0.37573021  |
| C | 2.14764186  | 1.21078208  | 0.57180509  |
| C | 2.84979636  | -0.88910656 | -0.56838918 |
| H | 1.43083113  | -0.91433943 | 1.85639497  |
| H | 0.83752697  | -2.00546779 | 0.60725002  |
| H | -1.09838878 | -1.30922482 | 1.89102327  |
| H | -0.59891281 | 0.36904335  | 1.88639920  |
| H | 0.36734195  | 2.42825578  | -0.91069506 |
| H | -0.49205760 | 2.18544906  | 0.62237446  |
| H | -1.38840730 | 2.49591786  | -0.86843570 |
| H | -2.61487139 | -2.09097951 | -0.08150887 |

---

|   |             |             |             |
|---|-------------|-------------|-------------|
| H | -1.03436739 | -2.19638149 | -0.89553945 |
| H | -2.35208992 | -1.31366504 | -1.65439210 |
| H | -3.39248536 | -0.15763851 | 0.99559639  |
| H | -3.32712077 | 0.73839184  | -0.52763559 |
| H | -2.57526558 | 1.40029454  | 0.93597658  |
| H | 2.98336169  | 0.94620309  | 1.22293940  |
| H | 1.39663556  | 1.69946430  | 1.18343445  |
| H | 2.52109295  | 1.92595675  | -0.16164186 |
| H | 3.45899674  | -1.18577356 | 0.28883571  |
| H | 3.47610941  | -0.29669508 | -1.23777633 |
| H | 2.51416861  | -1.77480915 | -1.10429735 |

### 3.4 Optimized structure of D (atom, x-, y-, z-positions in Å)

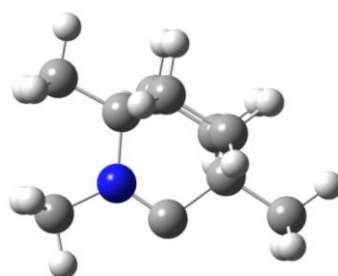

|                                              |                             |
|----------------------------------------------|-----------------------------|
| Zero-point correction=                       | 0.256651 (Hartree/Particle) |
| Thermal correction to Energy=                | 0.267449                    |
| Thermal correction to Enthalpy=              | 0.268393                    |
| Thermal correction to Gibbs Free Energy=     | 0.221451                    |
| Sum of electronic and zero-point Energies=   | -445.792494                 |
| Sum of electronic and thermal Energies=      | -445.781695                 |
| Sum of electronic and thermal Enthalpies=    | -445.780751                 |
| Sum of electronic and thermal Free Energies= | -445.827693                 |

**Supplementary Table 5.** Calculated geometries of **D** (atom, x-, y-, z-positions in Å)

|   |             |             |             |
|---|-------------|-------------|-------------|
| C | -1.03498295 | -0.48848271 | 0.00000176  |
| N | -0.71752828 | 0.96790056  | 0.00001860  |
| C | 0.52803221  | 1.37693550  | -0.00010919 |
| C | 1.44906693  | 0.17447619  | -0.00010312 |
| C | 1.12867634  | -0.66656109 | 1.25458942  |
| C | -0.35502157 | -1.07485865 | 1.24617535  |
| C | -0.35497968 | -1.07507929 | -1.24599267 |
| C | 1.12869976  | -0.66656164 | -1.25459642 |
| C | -2.52381494 | -0.79313981 | -0.00001606 |
| C | 2.90768829  | 0.60719969  | 0.00005954  |

|   |             |             |             |
|---|-------------|-------------|-------------|
| C | -1.79732455 | 1.95190945  | -0.00005335 |
| H | 1.36214741  | -0.07335605 | 2.13933187  |
| H | 1.78373198  | -1.54039836 | 1.26861766  |
| H | -0.47517013 | -2.15958163 | 1.22272748  |
| H | -0.87092100 | -0.70627024 | 2.13395905  |
| H | -0.87092209 | -0.70693704 | -2.13393966 |
| H | -0.47494777 | -2.15982679 | -1.22214334 |
| H | 1.78386414  | -1.54032430 | -1.26891254 |
| H | 1.36184524  | -0.07334720 | -2.13943536 |
| H | -2.64953935 | -1.87664983 | -0.00022344 |
| H | -3.01976382 | -0.40039940 | -0.88713126 |
| H | -3.01977313 | -0.40076088 | 0.88723468  |
| H | 3.11882849  | 1.21412948  | -0.88066936 |
| H | 3.57453455  | -0.25877507 | 0.00041290  |
| H | 3.11835376  | 1.21468078  | 0.88050300  |
| H | -1.31461231 | 2.92284444  | -0.00003389 |
| H | -2.42063998 | 1.84736674  | 0.88785519  |
| H | -2.42055712 | 1.84727564  | -0.88801477 |

### 3.5 Optimized structure of E (atom, x-, y-, z-positions in Å)

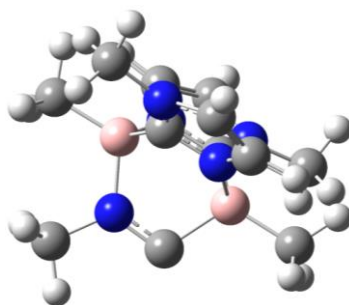

|                                              |                             |
|----------------------------------------------|-----------------------------|
| Zero-point correction=                       | 0.319056 (Hartree/Particle) |
| Thermal correction to Energy=                | 0.337389                    |
| Thermal correction to Enthalpy=              | 0.338333                    |
| Thermal correction to Gibbs Free Energy=     | 0.274520                    |
| Sum of electronic and zero-point Energies=   | -792.007695                 |
| Sum of electronic and thermal Energies=      | -791.989363                 |
| Sum of electronic and thermal Enthalpies=    | -791.988419                 |
| Sum of electronic and thermal Free Energies= | -792.052232                 |

### Supplementary Table 6. Calculated geometries of E (atom, x-, y-, z-positions in Å)

|   |             |             |             |
|---|-------------|-------------|-------------|
| B | 0.70203689  | 1.11598976  | 0.80373808  |
| B | -0.62611214 | -1.17214710 | 0.08341252  |
| C | 1.34918802  | 2.51966356  | 1.23081429  |
| C | 1.48453649  | 0.10945761  | -0.19157906 |
| C | 1.62014852  | -1.81586759 | -1.28494468 |



---

|   |             |             |             |
|---|-------------|-------------|-------------|
| H | 1.28500463  | -2.75836521 | -1.67713434 |
| C | 2.83388465  | -1.21476693 | -1.37338789 |
| H | 3.74396526  | -1.51936497 | -1.85628249 |
| C | 3.81573991  | 0.93553039  | -0.52523051 |
| H | 3.40175000  | 1.86317416  | -0.14815860 |
| H | 4.28964637  | 1.11209222  | -1.48871161 |
| H | 4.55127812  | 0.55378031  | 0.18095865  |
| C | -1.36470173 | 0.21705948  | -0.30555288 |
| C | -1.43704988 | 2.42213094  | -0.24143187 |
| H | -1.08742536 | 3.41770041  | -0.04015061 |
| C | -2.60495969 | 1.99519006  | -0.79202295 |
| H | -3.45959570 | 2.53462153  | -1.15652931 |
| C | -3.61167052 | -0.24987829 | -1.29080547 |
| H | -4.10225682 | 0.21443330  | -2.14302527 |
| H | -4.33820809 | -0.41164857 | -0.49573860 |
| H | -3.19002954 | -1.20131428 | -1.59422183 |
| C | 0.31786471  | 0.10591758  | 2.06743548  |
| C | -0.86003671 | -1.91372311 | 2.59594694  |
| C | -1.29068157 | -2.57244468 | -0.32842252 |
| N | 0.80589444  | -0.98963443 | -0.55198203 |
| N | 2.73156302  | -0.01808640 | -0.68713618 |
| N | -0.68468479 | 1.31159488  | 0.04166436  |
| N | -2.53908154 | 0.61616896  | -0.83311203 |
| N | -0.33823677 | -0.93309670 | 1.64220424  |
| H | -0.57629104 | -1.58026194 | 3.58965245  |
| H | -1.94821317 | -1.97705327 | 2.52139595  |
| H | -0.44376312 | -2.90348283 | 2.39948611  |
| H | -2.28340527 | -2.70812169 | 0.10442504  |
| H | -1.38834451 | -2.67630043 | -1.41320236 |
| H | -0.68051604 | -3.40995970 | 0.01720006  |
| H | 2.26531738  | 2.35815467  | 1.80272018  |
| H | 1.57403641  | 3.20078791  | 0.40345342  |
| H | 0.66567324  | 3.03367676  | 1.91172829  |

---

#### 4. References

- S1 B. Wang, Y. Li, R. Ganguly, H. Hirao and R. Kinjo, *Nat. Commun.*, 2016, **7**, 11871.
- S2 T. Seki, Y. Takamatsu and H. Ito, *J. Am. Chem. Soc.*, 2016, **138**, 6252–6260.
- S3 G. M. Sheldrick, *Acta Cryst.*, 2015, **A71**, 3-8.
- S4 G. M. Sheldrick, *Acta Cryst.*, 2015, **C71**, 3-8.
- S5 Gaussian 09, Revision B.01, M. J. Frisch, G. W. Trucks, H. B. Schlegel, G. E. Scuseria, M. A. Robb, J. R. Cheeseman, G. Scalmani, V. Barone, B. Mennucci, G. A. Petersson, H. Nakatsuji, M. Caricato, X. Li, H. P. Hratchian, A. F. Izmaylov, J. Bloino, G. Zheng, J. L. Sonnenberg, M. Hada, M. Ehara, K. Toyota, R. Fukuda, J. Hasegawa, M. Ishida, T. Nakajima, Y. Honda, O. Kitao, H. Nakai, T. Vreven, J. A. Montgomery, Jr., J. E. Peralta, F. Ogliaro, M. Bearpark, J. J. Heyd, E. Brothers, K. N. Kudin, V. N. Staroverov, T. Keith, R. Kobayashi, J. Normand, K. Raghavachari, A. Rendell, J. C. Burant, S. S. Iyengar, J. Tomasi, M. Cossi, N. Rega, J. M. Millam, M. Klene, J. E. Knox, J. B. Cross, V. Bakken, C. Adamo, J. Jaramillo, R. Gomperts, R. E. Stratmann, O. Yazyev, A. J. Austin, R. Cammi, C. Pomelli, J. W. Ochterski, R. L. Martin, K. Morokuma, V. G. Zakrzewski, G. A. Voth, P. Salvador, J. J. Dannenberg, S. Dapprich, A. D. Daniels, O. Farkas, J. B. Foresman, J. V. Ortiz, J. Cioslowski, D. J. Fox, Gaussian, Inc., Wallingford CT, 2010.
